# Supplementary material
Source: PubMed Central journal article supplement (PMC8795757)
Supplement: sj-pdf-1-nej-10.1177_09697330211066574.pdf [file sj-pdf-1-nej-10.1177_09697330211066574.pdf]

**Supplementary table: Scenarios as described in Ethical Conflict Nursing Questionnaire-Critical Care Version (ECNQ-CCV) by Falco´-Pegueroles et al.(1)**

| <b>Scenario</b> | <b>Potentially Conflictive Situations</b>                                                                                                                                                                  |
|-----------------|------------------------------------------------------------------------------------------------------------------------------------------------------------------------------------------------------------|
| <b>S1</b>       | Administering treatments and/or performing tests that I consider unnecessary because they serve merely to prolong a terminal, irreversible process.                                                        |
| <b>S2</b>       | Having to administer treatments and/or carry out procedures without the critical patient, who is conscious, knowing their purpose and the risks involved.                                                  |
| <b>S3</b>       | Caring for a patient who I believe should be on an ordinary hospital ward rather than in a critical care unit.                                                                                             |
| <b>S4</b>       | Carrying out interventions that put institutional or health service interests before those of the patient.                                                                                                 |
| <b>S5</b>       | Failure to keep a patient’s clinical data confidential by sharing them with third parties or with people who are not directly involved in the patient’s care.                                              |
| <b>S6</b>       | Administering treatments and/or carrying out interventions without the patient’s family knowing the objectives, benefits and risks involved (when the patient has consented to the family being informed). |
| <b>S7</b>       | Realizing that the analgesia and/or sedation being given to the patient is not effective enough and that the patient is suffering.                                                                         |
| <b>S8</b>       | Using all available technical and/or human resources despite believing that they will produce no significant improvement in the clinical status of the critical care patient.                              |
| <b>S9</b>       | Working with medical staff who I consider to be professionally incompetent.                                                                                                                                |
| <b>S10</b>      | Administering treatments and/or carrying out interventions in accordance with the family’s wishes, despite knowing that these clash with the patient’s interests.                                          |
| <b>S11</b>      | Administering treatments and/or carrying out procedures that are too aggressive given the status of the patient, and in so doing causing the patient additional suffering.                                 |
| <b>S12</b>      | Working with a nurse or nursing assistant who I consider to be professionally incompetent.                                                                                                                 |
| <b>S13</b>      | Acting contrary to my own moral beliefs due to not having enough time to care properly for the patient.                                                                                                    |
| <b>S14</b>      | Administering treatments in the context of a clinical trial or research project without, as a nurse, being given all the information I consider necessary to carry out this task.                          |
| <b>S15</b>      | Finding it difficult to give timely information to the patient and/or his/her family because the medical team discourages nurses from taking the initiative in this regard.                                |
| <b>S16</b>      | Caring for a patient without knowing whether he or she has made a living will declaration, or if such a document exists not knowing its content.                                                           |
| <b>S17</b>      | Administering treatments and/or carrying out procedures without, as a nurse, having been previously involved in the decision to do so.                                                                     |
| <b>S18</b>      | Failure to respect properly the privacy of the patient’s body when carrying out procedures and/or exploratory tests.                                                                                       |
| <b>S19</b>      | Lacking the means (space) and/or resources (time) that would enable the clinical team to consider the ethical problems they have to face.                                                                  |
